# Supplementary material for: Detecting Coevolution in and among Protein Domains
Source: PLOS journal article supplement (doi:10.1371/journal.pcbi.0030211), 2007-10-30
Supplement: S1 (10.1371/journal.pcbi.0030211.s001) [file journal.pcbi.0030211.s001]

| function                                      | count |
|-----------------------------------------------|-------|
| ribosomal proteins                            | 91    |
| RNA polymerase                                | 33    |
| carbon metabolism enzymes, same proteins      | 19    |
| carbon metabolism enzymes, different proteins | 12    |
| B12 dependent enzymes, same proteins          | 7     |
| B12 dependent enzymes, different proteins     | 5     |
| translational apparatus, same proteins        | 7     |
| translational apparatus, different proteins   | 4     |
| virus proteins                                | 8     |
| conjugal transfer proteins                    | 4     |
| transcription factors                         | 4     |
| vitamin biosynthesis enzymes                  | 5     |
| dynammin                                      | 3     |
| RNA polymerase-ribosomal proteins             | 69    |
| others                                        | 55    |
