# Supplementary material for: Detecting Coevolution in and among Protein Domains
Source: PLOS journal article supplement (doi:10.1371/journal.pcbi.0030211), 2007-10-30
Supplement: S6 (10.1371/journal.pcbi.0030211.s006) [file journal.pcbi.0030211.s006]

## Covariation due to the mismatch of gene tree and species tree

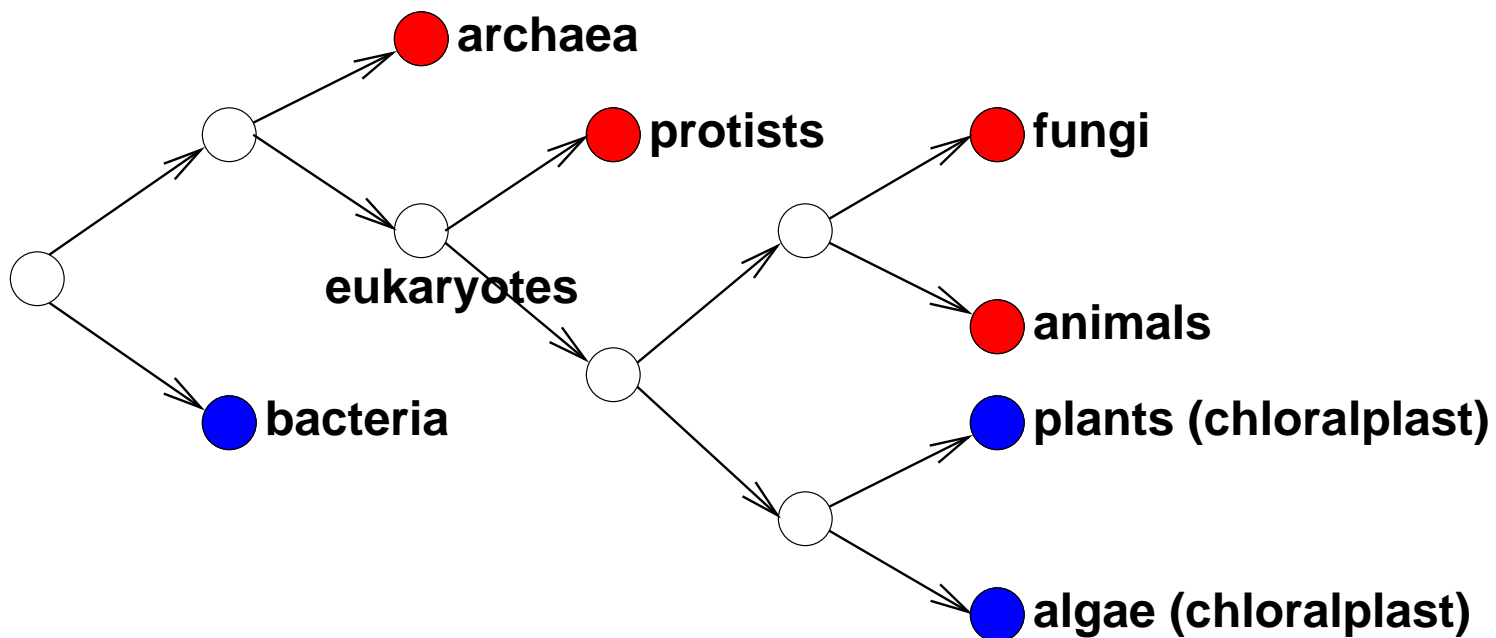

sequence evolution on species tree.

sequence pair 1 (blue) appears in bacteria, plants and algae.

sequence pair 2 (red) appears in archaea, non-green eukaryote.

transition between 1 and 2 occurs twice.

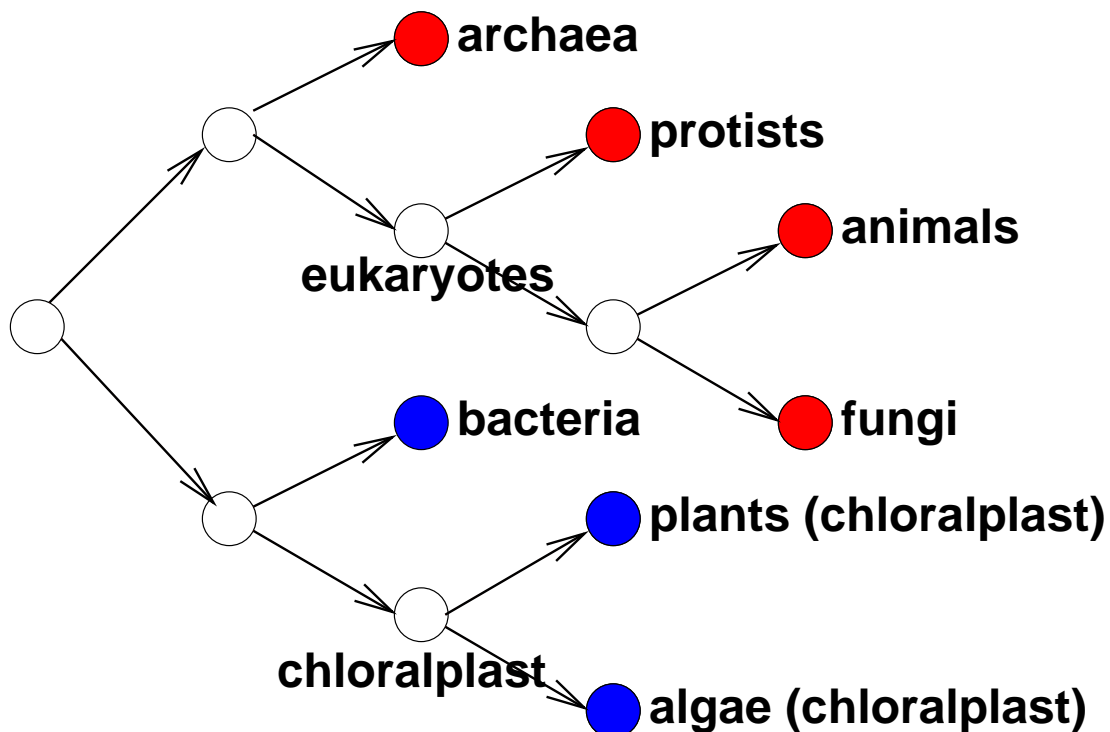

sequence evolution on gene tree.

sequence pair 1 (blue) appears in bacteria and chloroplast.

sequence pair 2 (red) appears in eukaryotes and archaea.

transition between 1 and 2 occurs once.
